# Supplementary material for: Shenling Baizhu San improves functional dyspepsia in rats as revealed by 1H-NMR based metabolomics
Source: Royal Society of Chemistry journal article supplement (doi:10.1039/d0ay00580k), 2020-01-01
Supplement: d0ay00580k1.pdf [file d0ay00580k1.pdf]

Table S1 NMR data for metabolites detected in feces on day 42

| Keys | Metabolites                       | $\delta^1\text{H}$ (ppm)                                     | $\delta^{13}\text{C}$ (ppm)     |
|------|-----------------------------------|--------------------------------------------------------------|---------------------------------|
| F1   | 1,3-Dihydroxyacetone              | 4.420(s), 3.571(s)                                           | 67.5                            |
| F2   | 2-Ketoisovalerate                 | 1.130(d), 3.027(m)                                           | 18.8, 39.5                      |
| F3   | 3-Methyl-2-ketovalerate           | 0.888(t), 1.102(d), 1.461(m), 1.731(m), 2.939(m)             | 13.3                            |
| F4   | 3-Methyl-2-oxovalerate            | 0.898(t), 1.103(d), 1.448(m), 1.671(m), 2.926(m)             | 13.2, 16.4, 26.8, 26.8, 45.9    |
| F5   | 5-Aminovalerate                   | 1.620(m), 1.650(m), 2.240(t), 3.021(t)                       | 25.6, 29.7, 39.3, 41.4          |
| F6   | Acetate                           | 1.924(s)                                                     | 26.5                            |
| F7   | Adenine                           | 8.190(s), 8.211(s)                                           | 144.2, 156.2                    |
| F8   | Alanine                           | 1.488(d), 3.787(m)                                           | 18.3, 53.3                      |
| F9   | Arginine                          | 1.698(m), 1.925(m), 3.248(t), 3.760(t)                       | 30.5, 30.5, 44.6, 57.5          |
| F10  | Aspartate                         | 2.683(dd), 2.80(dd), 3.91(dd)                                | 39.3, 39.3, 55.1                |
| F11  | Butyrate                          | 0.903(t), 1.561(m), 2.157(t)                                 | 16.0, 22.1, 42.3                |
| F12  | Cadaverine                        | 1.483(d), 1.724(m), 3.022(t)                                 | 25.9, 29.4, 41.4                |
| F13  | Caproate                          | 0.887(t), 1.309(m), 1.556(m), 2.178(t)                       | 16.2, 32.6, 23.6, 29.1, 39.5    |
| F14  | Choline                           | 3.204(s), 3.519(t), 4.061(m)                                 | 56.9, 70.1, 58.2                |
| F15  | Citrulline                        | 1.57(m), 1.88(m), 3.149(m), 3.665(m)                         | —, —, 42.0, 57.9                |
| F16  | Creatine                          | 3.050(s), 3.929(s)                                           | 40.1, 56.2                      |
| F17  | Deoxycholic Acid                  | 0.720(s)                                                     | —                               |
| F18  | Ethanolamine                      | 3.134(d), 3.817(d)                                           | 45.4, 60.2                      |
| F19  | Fatty acids and fatty acyl chains | 0.882(t)                                                     | 16.8                            |
| F20  | Formate                           | 8.463(s)                                                     | 172.0                           |
| F21  | Fumarate                          | 6.524(s)                                                     | 137.5                           |
| F22  | Glutamine                         | 2.155(m), 2.447(m), 3.773(t)                                 | 29.53, 32.96, 57.10             |
| F23  | Glutarate                         | 2.181(t)                                                     | —, 39.44                        |
| F24  | Glycine                           | 3.570(s)                                                     | 44.5                            |
| F25  | Hypoxanthine                      | 8.197(s), 8.216(s)                                           | 149.4, 143.2                    |
| F26  | Isocaproate                       | 0.882(d), 1.449(m), 1.483(d), 2.191(t)                       | —, 37.56, 30.7, 39.3            |
| F27  | Isoleucine                        | 0.943(t), 1.00(d), 1.267(m), 1.470(m), 1.984(m),<br>3.676(d) | 14.7, 17.2, 26.8, 26.8, 62.4    |
| F28  | Lactate                           | 1.34(d), 4.123(d)                                            | 22.9, 71.4                      |
| F29  | Leucine                           | 0.96(d), 0.97(d), 1.696(m), 1.721(m), 1.738(m),<br>3.740(m)  | 23.4, 24.3, 26.6, 56.9          |
| F30  | Lycine                            | 1.483(m), 1.724(m), 1.896(m), 3.027(t), 3.765(t)             | 23.44, 29.72, —, 41.5,<br>57.58 |
| F31  | Malonate                          | 3.110(s)                                                     | 50.1                            |
| F32  | Methylamine                       | 2.618(s)                                                     | 27.6                            |
| F33  | Methanol                          | 3.356(s)                                                     | 51.2                            |

|     |                                       |                                                                                        |                                         |
|-----|---------------------------------------|----------------------------------------------------------------------------------------|-----------------------------------------|
| F34 | Methionine                            | 2.146(s), 2.202(m), 2.646(t), 3.864(m)                                                 | 16.0, 31.3, 29.4, 56.7                  |
| F35 | Methylsuccinate                       | 1.104(d), 2.130(d), 2.633(m)                                                           | 20.68, 44.43, —                         |
| F36 | N, N-Dimethylglycine                  | 2.920(s), 3.714(s)                                                                     | 46.1, 62.2                              |
| F37 | N-Acety-glycoprotein                  | 2.032(s)                                                                               | 24.5                                    |
| F38 | N-Acetyl group contained glycoprotrin | 2.042(s), 2.080(s)                                                                     | —                                       |
| F39 | N-Acetyl-D-glucosamine                | 3.760(m), 3.872(m), 5.211(d)                                                           | —                                       |
| F40 | N-Heptanoate                          | 1.556(m)                                                                               | 30.2                                    |
| F41 | Nicotinate                            | 7.532(dd), 8.160(m), 8.617(dd), 8.946(s)                                               | —                                       |
| F42 | Phenylacetate                         | 3.542(s), 7.317(m), 7.375(m)                                                           | 47.2, 129.6, 131.1                      |
| F43 | Phenylalanine                         | 3.131(dd), 3.290(dd), 3.982(dd), 7.330(m), 7.380(m), 7.430(m)                          | 38.9, 38.9, 58.9, 132.2, 129.8, 131.9   |
| F44 | 4-Hydroxyphenylacetate                | 3.453(s), 6.867(d), 7.203(d)                                                           | 46.9, 118.2, 133.4                      |
| F45 | Proline                               | 2.007(m), 2.070(dd), 2.357(m), 3.336(m), 3.462(d), 4.125(m)                            | 25.8, 32.1, 48.7, 48.7, 63.5            |
| F46 | Propionate                            | 1.060(t), 2.187(q)                                                                     | 12.9, 33.3                              |
| F47 | Pyruvate                              | 2.377(s)                                                                               | 29.5                                    |
| F48 | Sarcosine                             | 2.704(s), 3.597(s)                                                                     | 34.8, 53.7                              |
| F49 | Serine                                | 3.828(dd), 3.949(dd), 3.981(dd)                                                        | 59.32, —, —                             |
| F50 | Succinate                             | 2.410(s)                                                                               | 37.3                                    |
| F51 | Taurine                               | 3.259(t), 3.437(t)                                                                     | 49.5, 37.5                              |
| F52 | Taurochenodeoxycholate                | 0.675(s), 0.960(s)                                                                     | —                                       |
| F53 | Taurocholic Acid (TCA)                | 0.671(s)                                                                               | —, 77.1                                 |
| F54 | Tayricholic                           | 0.671(s), 1.043(s), 1.354(m), 1.410(m), 1.730(m), 2.22(m), 2.30(m), 3.086(t), 3.574(m) | —                                       |
| F55 | Tauro-β-Muricholic Acid (TβMCA)       | 0.693(s)                                                                               | —                                       |
| F56 | Threonine                             | 1.338(d), 3.590(d), 4.258(m)                                                           | 23.5, 63.2, 68.2                        |
| F57 | Trimethylamine                        | 2.880(s)                                                                               | 47.4                                    |
| F58 | Trimethylamine N-Oxide                | 3.261(s)                                                                               | 61.5                                    |
| F59 | Tryptophan                            | 7.203(m), 7.289(m), 7.31(s), 7.548(m), 7.741(m)                                        | 122.3, 124.9, 128.0, 115.2, 121.3, 92.5 |
| F60 | Tyrosine                              | 3.050(dd), 3.194(dd), 3.943(dd), 6.904(m), 7.196(m)                                    | 37.9, 37.8, 59.4, 118.8, 133.4          |
| F61 | Uracil                                | 5.805(d), 7.540(d)                                                                     | 104.2, 146.2                            |
| F62 | Urocanate                             | 6.400(d), 7.310(d), 7.431(s), 7.894(s),                                                | 133.4, 124.7, 141.4, 134.2              |
| F63 | Valerate                              | 0.899(t), 1.309(m), 2.178(d)                                                           | 16.4, 23.9, 39.6                        |
| F64 | Xanthine                              | 7.900(s)                                                                               | 141.8                                   |
| F65 | α-Arabinose                           | 5.213(d), 5.300(d), 4.510(d), 4.100(m), 3.890(m),                                      | —, —, 72.3, 66.3, 93.9                  |

|     |                                          |                                                                          |                                       |
|-----|------------------------------------------|--------------------------------------------------------------------------|---------------------------------------|
|     |                                          | 3.663(m)                                                                 |                                       |
| F66 | $\alpha$ -Galactose                      | 3.816(m), 3.862(m), 3.998(m), 5.273(d)                                   | 71.7, 73.3, 72.5, —, 95.3             |
| F67 | $\alpha$ -Glucose                        | 3.406(m), 3.590(dd), 3.733(m), 3.733(m),<br>3.846(m), 3.846(m), 5.520(d) | 72.4, 74.3, 75.4, —, —,<br>75.2, 94.9 |
| F68 | $\alpha$ -Ketoglutarat                   | 2.452(t), 3.010(t)                                                       | —                                     |
| F69 | $\alpha$ -Ketogluturate                  | 2.443(t), 3.011(t)                                                       | 33.4, 38.3                            |
| F70 | $\alpha$ -Ketoisocaproate                | 0.920(d), 2.066(m), 2.616(d)                                             | —                                     |
| F71 | $\alpha$ -Ketoisovalerate                | 1.130(d), 3.020(m)                                                       | 18.8, 39.5                            |
| F72 | $\alpha$ -Keto- $\beta$ -methyl-valerate | 0.887(t), 1.104(d), 1.687(m), 2.923(m)                                   | —                                     |
| F73 | $\alpha$ -L-Fucose                       | 1.201(d), 3.771(m), 3.771(m), 3.872(m), 4.202(m),<br>5.211(d)            | 17.8, 72.8, 72.8, 95.6                |
| F74 | $\alpha$ -Xylose                         | 5.190(d), 4.571(d), 3.922(q), 3.521(dd), 3.430(t),<br>3.316(t)           | 99.7                                  |
| F75 | $\beta$ -Arabinose                       | 3.520(dd), 3.670(t), 3.951(m), 3.863(dd), 4.522(d)                       | —, —, 72.3, 66.3, 93.9                |
| F76 | $\beta$ -Galactose                       | 3.493(dd), 3.656(m), 3.937(m), 4.592(d)                                  | 71.7, 73.3, 72.5, —, 95.3             |
| F77 | $\beta$ -Glucose                         | 3.294(m), 3.515(m), 3.743(m), 3.909(dd), 4.656(d)                        | —, —, —, 63.26, 63.26,<br>98.3        |
| F78 | $\beta$ -L-Fucose                        | 1.250(d), 3.452(m), 3.644(m), 3.805(m), 3.805(m),<br>4.562(d)            | 17.8, 72.8, 72.8, 95.6                |

---

“—”: The corresponding  $^{13}\text{C}$  shift values are not found in the HSQC spectra, and the metabolites without  $^{13}\text{C}$  shift values were assigned only based on the  $^1\text{H}$  shift in the TOCSY spectrum.

Table S2 NMR data for metabolites detected in urine on day 42

| Keys | Metabolites                | $\delta^1\text{H}$ (ppm)                                       | $\delta^{13}\text{C}$ (ppm)           |
|------|----------------------------|----------------------------------------------------------------|---------------------------------------|
| U1   | 2-Hydroxy-3-methylvalerate | 0.807(t), 0.931(d), 1.152(m), 1.353(m), 1.752(m),<br>3.876(d)  | —                                     |
| U2   | 2-Hydroxybutyrate          | 0.899(m), 1.689(m), 3.996(d)                                   | 10.7, 29.5, —, 76.1                   |
| U3   | 2-Hydroxyisobutyrate       | 1.143(s)                                                       | 30.0                                  |
| U4   | 2-Ketoglutarate            | 2.440(t), 3.010(t)                                             | 32.5, 40.4, 184.4, 208.1              |
| U5   | 2-Ketoisovalerate          | 1.110(d), 3.020(m)                                             | 18.8, 39.5                            |
| U6   | 2-Methylglutarate          | 1.071(d), 1.602(m), 1.754(m), 2.150(t), 2.240(m)               | —                                     |
| U7   | 2-Oxoglutarate             | 2.431(t), 3.004(t)                                             | 33.2, 39.0                            |
| U8   | 3-Hydroxyisobutyrate       | 1.061(d), 2.487(m), 3.525(m), 3.714(m)                         | 19.5, —, —, —                         |
| U9   | 3-Hydroxyisovalerate       | 1.270(s), 2.380(s)                                             | 30.2, 51.6                            |
| U10  | 3-Methyl-2-oxovalerate     | 0.899(t), 1.103(d), 1.438(m), 1.662(m), 2.928(m)               | 13.2, 16.4, 26.8, 26.8,<br>45.9       |
| U11  | p-Cresol glucuronide       | 7.231(d), 7.062(d), 2.301(s)                                   | 22.3, 123.2, 135.6                    |
| U12  | 4-Hydroxyphenylacetate     | 6.871(d), 7.160(d), 3.451(s)                                   | 46.9, 118.2, 133.4                    |
| U13  | 5-Aminovalerate            | 1.624(t), 1.650(t), 2.237(m), 3.022(m)                         | 25.6, 29.7, 39.3, 41.4                |
| U14  | Acetamide                  | 2.035(s)                                                       | 25.0                                  |
| U15  | Acetate                    | 1.921(s)                                                       | 26.5                                  |
| U16  | Acetoacetate               | 2.270(s), 3.444(s), 2.372(s)                                   | 32.3, —                               |
| U17  | Acetone                    | 2.240(s)                                                       | 28.2                                  |
| U18  | Acetylcarnitine            | 2.151(s), 2.504(m), 2.631(m), 3.202(s), 3.621(d),<br>3.829(dd) | 22.4, 44.0, 44.0, 57.5,<br>70.9, 70.9 |
| U19  | Adenine                    | 8.195(s), 8.213(s)                                             | 144.3, 156.5                          |
| U20  | Adipate                    | 2.192(t), 1.547(m)                                             | —                                     |
| U21  | Alanine                    | 3.785(q), 1.480(d)                                             | 18.3, 53.3                            |
| U22  | Allantoate                 | 5.290(s)                                                       | —                                     |
| U23  | Allothreonine              | 1.191(d), 4.265(m), 3.843(d)                                   | 22.0, 70.2                            |
| U24  | Arginine                   | 3.778(m), 1.934(m), 1.735(m), 3.257(t)                         | 30.5, 30.5, 44.6, 57.5                |
| U25  | Aspartate                  | 2.666(dd), 2.805(dd), 3.900(dd)                                | 39.3, 39.3, 55.1                      |
| U26  | Betaine                    | 3.273(s), 3.902(s)                                             | 57.0, 68.0                            |
| U27  | Butyrate                   | 0.940(t), 2.180(t), 1.588(m)                                   | 16.0, 22.1, 42.3                      |
| U28  | Cadaverine                 | 1.483(d), 1.724(m), 3.022(t)                                   | 25.9, 29.4, 41.4                      |
| U29  | Caproate                   | 0.887(t), 1.309(m), 1.556(m), 2.178(t)                         | 16.23, 32.69, 23.66,<br>29.05, 39.54  |
| U30  | Carnitine                  | 2.410(t), 3.230(s), 3.405(m), 4.554(m)                         | —, 57.51, 71.6, 66.38                 |
| U31  | Choline                    | 3.211(s), 3.538(m), 4.076(m)                                   | 57.2, 70.3, 57.2                      |
| U32  | Citrate                    | 2.541(d), 2.660(d)                                             | 46.5, 76.4, 181.5                     |

|     |                       |                                                                 |                                         |
|-----|-----------------------|-----------------------------------------------------------------|-----------------------------------------|
| U33 | Creatine              | 3.040(s), 3.933(s)                                              | 40, 56.9, 160, 177.6                    |
| U34 | Creatine phosphate    | 3.032(s), 3.940(s)                                              | 40.1, 56.2                              |
| U35 | Creatinine            | 3.050(s), 4.060(s)                                              | 33.2, 59.2, 172.1, 191.9                |
| U36 | Cysteine              | 3.051(s), 3.982(dd)                                             | 27.8, 63.1                              |
| U37 | Deoxycytidine         | 6.270(t), 2.360(dd), 7.820(d), 6.052(d)                         | —, —, —, 145.7                          |
| U38 | Desaminotyrosine      | 2.463(t), 2.835(t), 6.859(d), 7.191(d)                          | 42.87, 33.72, 118.54,<br>132.6          |
| U39 | Dimethyl sulfone      | 3.940(s)                                                        | —                                       |
| U40 | Dimethylamine         | 2.721(s)                                                        | 37.8                                    |
| U41 | Dimethylglycine       | 2.921(s), 3.720(s)                                              | 40.4, 62.6, 173.1                       |
| U42 | Ethanol               | 1.185(t), 3.656(q)                                              | 19.54, —                                |
| U43 | Ethanolamine          | 3.1349(d), 3.817(d)                                             | 44.4, 60.2                              |
| U44 | Formate               | 8.461(s)                                                        | 172, —                                  |
| U45 | Fucose                | 1.250(d), 3.816(m), 5.214(d), 3.770(m)                          | 18.6, 73, 94.8, —                       |
| U46 | Fumarate              | 6.920(s)                                                        | 138.6, 177.7                            |
| U47 | Galactarate           | 3.953(s), 4.160(s)                                              | —                                       |
| U48 | Galactonate           | 4.260(s)                                                        | —                                       |
| U49 | Glucuronate           | 3.574(dd), 3.724(m), 4.070(d), 4.642(d), 5.243(d)               | —                                       |
| U50 | Glutamate             | 3.781(t), 2.060(m), 2.358(m)                                    | 57.7, 29.9, 36.8, 178                   |
| U51 | Glutamine             | 2.142(m), 2.463(m), 3.770(t)                                    | 57.2, 29, 34, 175.4,<br>180.5           |
| U52 | Glutarate             | 2.181(t)                                                        | 26.15, 39.44                            |
| U53 | Glycerate 3-phosphate | 4.225(m), 4.064(d), 3.843(d)                                    | 80.0, —, 64.5                           |
| U54 | Glycerol              | 3.551(t), 3.634(m), 3.767(m)                                    | —                                       |
| U55 | Glycerophosphocholine | 3.223(s), 3.689(m), 3.925(m), 4.317(dd)                         | 55.9, 68.1, 73.9, 64.4                  |
| U56 | Glycine               | 3.563(s)                                                        | 44.4, 175.6                             |
| U57 | Glycogen              | 5.290(d), 3.600(d), 3.890(d), 3.700(dd), 3.863(d),<br>3.464(dd) | 102.6, 74.7, 63.8, 65.4,<br>63.6, 72.5  |
| U58 | Glycolate             | 3.941(s)                                                        | 64.2                                    |
| U59 | Glycylproline         | 3.941(s), 3.880(d)                                              | 49.0, 42.7                              |
| U60 | GPC                   | 3.241(s), 3.694(d), 4.139(m)                                    | 56.9, 69.1, 62.5                        |
| U61 | GSSG                  | 3.789(m), 2.554(m), 2.177(m), 3.320(dd), 4.660(t)               | 56.4, 34.2, 29.7, 177.2,<br>41.9, 41.9, |
| U62 | Guanidoacetate        | 3.800(s)                                                        | 47.7, 160.3, 178.3                      |
| U63 | Guanine               | 7.891(s)                                                        | 145.5, 168.5, 156.4,<br>81.8            |
| U64 | Hippurate             | 3.961(d), 7.540(t), 7.620(t), 7.820(t), 8.521(s)                | 132.1, 135.5, 130.2,<br>47.2            |
| U65 | Hypotaurine           | 3.360(t), 2.662(t)                                              | 37, 58.5                                |

|     |                                 |                                                                      |                                                      |
|-----|---------------------------------|----------------------------------------------------------------------|------------------------------------------------------|
| U66 | Hypoxanthine                    | 8.201(s)                                                             | 145.6                                                |
| U67 | Indole-3-acetate                | 3.681(s), 7.161(t), 7.216(t), 7.507(d), 7.635(d)                     | 36.65, 121.26, 126.49, 114.38, 121.37                |
| U68 | Isobutyrate                     | 1.053(d), 2.382(m)                                                   | 22.04, 39.32                                         |
| U69 | Isocaproate                     | 0.882(d), 1.449(m), 1.483(d), 2.191(t)                               | —, 37.57, —, 39.33                                   |
| U70 | Isoleucine                      | 0.936(t), 0.995(d), 1.249(m), 1.452(m), 1.971(m), 3.655(d)           | 62.3, 38.6, 27.5, 27.5, 17.9, 20.9, 178.1            |
| U71 | Isovalerylglycine               | 0.925(d), 1.994(m), 2.166(d), 3.746(d)                               | 24.37, 30.2, 46.93, —                                |
| U72 | Ketoleucine                     | 0.944(s), 2.080(m), 2.817(d)                                         | 24.32, 26.2, —                                       |
| U73 | Lactate                         | 4.113(q), 1.332(d)                                                   | 71.4, 23.1, 185.5                                    |
| U74 | Lactose                         | 5.222(d), 4.676(d), 3.295(t)                                         | 104.59, 98.91, —                                     |
| U75 | Leucine                         | 3.751(d), 1.782(s), 1.590(m), 0.972(d)                               | 60.3, 42.8, 27.5, 24.6, 178.3                        |
| U76 | Lysine                          | 3.761(t), 3.030(t), 1.626(m)                                         | 64.1, 42.2, 33.4, 177                                |
| U77 | Malate                          | 2.671(dd), 2.370(dd), 4.353(dd)                                      | 45.8, 73.5, 183.6                                    |
| U78 | Malonate                        | 3.053(s)                                                             | 51.5                                                 |
| U79 | Mannitol                        | 3.677(d), 3.770(m), 3.873(dd)                                        | 65.37, 72.8, 66.69                                   |
| U80 | Methanol                        | 3.366(s)                                                             | 52.1                                                 |
| U81 | Methionine                      | 3.875(m), 2.162(t), 2.650(s), 2.140 (s)                              | 57.2, 31.3, 29.4, 16.6, —                            |
| U82 | Methyl phosphate                | 3.470(d)                                                             | 54.2                                                 |
| U83 | Methylamine                     | 2.600(s)                                                             | 28.1                                                 |
| U84 | Methylguanidine                 | 2.833(s)                                                             | 30.2, 158.7                                          |
| U85 | Methylsuccinate                 | 1.104(d), 2.134(d), 2.633(m)                                         | 20.68, 44.43, —                                      |
| U86 | N,N-dimethylglycine             | 2.921(s), 3.713(s)                                                   | 40.4, 62.6, 173.1                                    |
| U87 | N6,N6,N6-trimethyllysine        | 3.109(s)                                                             | 47.14                                                |
| U88 | N-Acetylglycine                 | 2.032(s), 3.740(d), 7.980(s)                                         | 24.2, 46.1, —                                        |
| U89 | NAG C                           | 2.042(s)                                                             | 23.2, 175.6                                          |
| U90 | N-Heptanoate                    | 1.309(m)                                                             | 30.22                                                |
| U91 | N-Methylhydantoin               | 2.920(s), 4.080(s)                                                   | —                                                    |
| U92 | N-Nitrosodi Phenylacetylglycine | 3.010(s), 3.802(s)                                                   | 145.1, 167.8                                         |
| U93 | O-Acetylcholine                 | 2.143(s), 3.202(s), 3.711(t), 4.529(m)                               | 23.4, 56.8, 67.1, 60.2                               |
| U94 | OAG                             | 2.140(s)                                                             | 21, 175.6                                            |
| U95 | Ornithine                       | 1.775(m), 1.828(m), 1.929(m), 3.044(t), 3.782(d)                     | 25.5, 25.5, —, 41.12, 56.81                          |
| U96 | Oxypurinol                      | 8.210(s)                                                             | 129.09                                               |
| U97 | Pantothenate                    | 0.940(s), 0.900(s), 3.521(s), 3.400(s), 4.000(s), 3.450(t), 2.433(t) | 23.7, 22.2, 71.5, 78.7, 41.4, 177.8, 39.5, 39.5, 183 |
| U98 | PC                              | 3.224(s), 3.609(m), 4.173(m)                                         | 56.9, 77.6, 61                                       |

|      |                              |                                                                 |                                       |
|------|------------------------------|-----------------------------------------------------------------|---------------------------------------|
| U99  | <i>p</i> -Cresol glucuronide | 2.299(s), 7.055(m), 7.237(m)                                    | 133.3, 124.4, 22.7, 136.2             |
| U100 | <i>p</i> -Cresol sulfate     | 2.347(s), 7.217(d), 7.293(d)                                    | —, 121.61, 136.05                     |
| U101 | Phenylacetate                | 3.530(s)                                                        | 118.2, 133.4                          |
| U102 | Phenylacetyl glycine         | 7.428(m), 7.369(m), 7.366(m), 3.650(s)                          | 130, 129.1, 40.8, 40.8, 177.4         |
| U103 | Phenylalanine                | 7.320(dd), 7.420(dd), 7.368(m), 3.120(dd), 3.253(dd), 3.980(dd) | 38.9, 38.9, 58.9, 132.2, 129.8, 131.9 |
| U104 | Proline                      | 2.023(s), 2.354(m), 3.320(m), 3.398(m), 4.147(t)                | 25.78, 32.11, 48.71, 48.71, 63.51     |
| U105 | Propionate                   | 1.061(t), 2.191(d)                                              | 12.95, 33.35                          |
| U106 | Pyruvate                     | 2.372(s)                                                        | 36.2, 172.9, 207.9                    |
| U107 | Sarcosine                    | 2.762(s), 3.650(s)                                              | 39.4, 50.9, 185.8                     |
| U108 | Scyllo-inositol              | 3.350(s)                                                        | 74.3                                  |
| U109 | Sebacate                     | 2.184(t), 1.567(m), 1.312(m)                                    | 48.4, 28.4, 31.9                      |
| U110 | Serine                       | 3.828(dd), 3.949(dd), 3.981(dd)                                 | 59.32, —, —                           |
| U111 | Succinate                    | 2.412(s)                                                        | 37.6, 185.4                           |
| U112 | Sucrose                      | 3.661(dd), 3.740(dd), 3.480(dd), 3.857(m), 4.104(d)             | 75.5, 72.2, 75.3, 79.3, 76.9          |
| U113 | Tartrate                     | 4.573(s)                                                        | 77.38                                 |
| U114 | Taurine                      | 3.273(t), 3.421(t)                                              | 38.1, 50.6                            |
| U115 | Threonine                    | 3.600(d), 4.267(m), 1.330(d)                                    | 25.6, 66.1, 68.7, 185.4               |
| U116 | Triglycerides                | 5.212(m), 4.073(m), 4.281(m)                                    | 69.9, 62.8, 62.8                      |
| U117 | Trimethylamine               | 2.882(s)                                                        | 47.6                                  |
| U118 | Trimethylamine N-Oxide       | 3.266(s)                                                        | 61.5                                  |
| U119 | Tryptophan                   | 3.298(dd), 3.498(dd), 4.089(q), 7.204(t), 7.310(m), 7.507(d)    | 119.5, 122.5, 125, 112.9              |
| U120 | Tyrosine                     | 6.911(d), 7.200(d), 3.941(dd), 3.202(dd), 3.073(dd)             | 118.7, 133.7, 58.7, 38.2, 38.2        |
| U121 | Uracil                       | 5.805(d), 7.540(d)                                              | 103.9, 146.4                          |
| U122 | Urea                         | 5.792(s)                                                        | —                                     |
| U123 | Urocanate                    | 7.318(d), 7.434(s), 7.885(s), 6.40(d)                           | 136.9, 132.1, 123.3, 133.4, 124.6     |
| U124 | Valerate                     | 0.899(t), 1.309(m), 2.168(d)                                    | 16.4, 23.9, 39.6                      |
| U125 | Valine                       | 3.622(d), 2.282(m), 1.050(d), 0.994 (d)                         | 63.2, 32.0, 21.2, 19.5, 177.9         |
| U126 | Xanthine                     | 7.901(s)                                                        | 144                                   |
| U127 | $\alpha$ -Arabinose          | 3.850(dd), 3.906(m), 3.993(t), 4.023(d), 5.251(d)               | —, —, 72.3, 66.37, 93.94              |

|      |                                          |                                                                               |                                       |
|------|------------------------------------------|-------------------------------------------------------------------------------|---------------------------------------|
| U128 | $\alpha$ -Glucose                        | 5.241(d), 3.540(dd), 3.730(dd), 3.421(dd),<br>3.830(dd), 3.830(dd)            | 95.4, 74.9, 76.2, 72.7,<br>74.4, 63.7 |
| U129 | $\alpha$ -Ketoglutarate                  | 2.443(t), 3.011(t)                                                            | 32.5, 40.4, 184.4, 208.1              |
| U130 | $\alpha$ -Ketoisocaproate                | 0.920(s), 2.054(m), 2.616(d)                                                  | —                                     |
| U131 | $\alpha$ -Ketoisovalerate                | 1.127(d), 3.022(m)                                                            | —, 40.1                               |
| U132 | $\alpha$ -Keto- $\beta$ -methyl-valerate | 0.887(t), 1.104(d), 1.687(m), 2.923(m)                                        | 13.2, 16.4, 26.8, 26.8,<br>45.9       |
| U133 | $\alpha$ -Xylose                         | 3.545(dd), 3.630(m), 3.671(t), 5.203(d)                                       | —                                     |
| U134 | $\beta$ -Arabinose                       | 3.525(dd), 3.671(t), 3.856(dd), 3.945(m), 4.523(d)                            | —, 69.8, 70.6, —, 99.7                |
| U135 | $\beta$ -Glucose                         | 4.450(d), 3.261(dd), 3.503(dd), 3.400(dd),<br>3.470(dd), 3.742(dd), 3.901(dd) | 99.3, 77.5, 79, 72.9, 79,<br>63.7     |

---

“—”: The corresponding  $^{13}\text{C}$  shift values are not found in the HSQC spectra, and the metabolites without  $^{13}\text{C}$  shift values were assigned only based on the  $^1\text{H}$  shift in the TOCSY spectrum.

Table S3 Summary table of differential metabolites during the whole experiment.

| □                             | □                 | Model vs Control |          |        |        |          |        |        |          |        |        |          | SBS vs Model |        |          |        |        |          |        |
|-------------------------------|-------------------|------------------|----------|--------|--------|----------|--------|--------|----------|--------|--------|----------|--------------|--------|----------|--------|--------|----------|--------|
|                               |                   | Day 7            |          |        | Day 14 |          |        | Day 28 |          |        | Day 42 |          |              | Day 28 |          |        | Day 42 |          |        |
|                               |                   | FC               | <i>P</i> | Trends | FC     | <i>P</i> | Trends | FC     | <i>P</i> | Trends | FC     | <i>P</i> | Trends       | FC     | <i>P</i> | Trends | FC     | <i>P</i> | Trends |
| <b>Energy metabolism</b>      | Citrate (U)       | 0.5332           | < 0.001  | ↓**    | 0.4459 | 0.0023   | ↓**    | 0.6369 | 0.0486   | ↓*     | 0.6150 | 0.0499   | ↓*           |        |          |        | 2.4360 | 0.0100   | ↑**    |
|                               | Oxoglutarate (U)  | 0.6789           | < 0.001  | ↓**    | 0.5711 | < 0.001  | ↓**    | 0.6995 | 0.0465   | ↓*     | 0.6766 | 0.0477   | ↓*           | 1.7026 | 0.0041   | ↑**    | 2.0975 | 0.0152   | ↑*     |
|                               | Succinate (U)     | 0.7420           | < 0.001  | ↓**    | 0.6752 | 0.0020   | ↓**    | 0.7237 | 0.0455   | ↓*     | 0.6995 | 0.0465   | ↓*           |        |          |        | 2.0391 | 0.0004   | ↑**    |
|                               | Fumarate (U)      | 1.6145           | < 0.001  | ↑**    |        |          |        |        |          |        |        |          |              |        |          |        | 2.0126 | 0.0217   | ↑*     |
|                               | Malate (U)        | 0.6944           | < 0.001  | ↓**    | 0.5718 | < 0.001  | ↓**    | 0.7242 | 0.0452   | ↓*     | 0.7237 | 0.0455   | ↓*           |        |          |        | 2.2163 | 0.0099   | ↑**    |
|                               | Malonate (U)      | 1.2434           | 0.0147   | ↑*     | 1.2434 | 0.0147   | ↑*     | 1.2859 | 0.0435   | ↑*     | 2.3968 | 0.0232   | ↑*           |        |          |        | 2.9945 | < 0.001  | ↑**    |
|                               | Triglycerides (U) | 0.6715           | 0.0429   | ↓*     |        |          |        |        |          |        |        |          |              |        |          |        | 3.4623 | < 0.001  | ↑**    |
|                               | Pyruvate (U)      |                  |          |        |        |          |        |        |          |        | 0.4215 | 0.0160   | ↓*           |        |          |        | 1.8860 | 0.0099   | ↑**    |
|                               | Glucose (U)       |                  |          |        | 1.2453 | < 0.001  | ↑**    | 1.2295 | 0.0001   | ↑**    | 1.2034 | 0.0001   | ↑**          |        |          |        | 2.6830 | < 0.001  | ↑**    |
| Glucose (F)                   |                   |                  |          |        |        |          | 1.2295 | 0.0001 | ↑**      |        |        |          | 0.7828       | 0.0072 | ↓**      |        |        |          |        |
| <b>Amino acids metabolism</b> | Phenylalanine (U) | 1.2318           | < 0.001  | ↑**    | 1.2318 | < 0.001  | ↑**    | 1.8527 | 0.0429   | ↑*     | 3.2213 | 0.0081   | ↑**          |        |          |        | 2.5449 | 0.0002   | ↑**    |
|                               | Aspartate (U)     | 0.7586           | < 0.001  | ↓**    | 0.6677 | 0.0001   | ↓**    | 0.6690 | 0.0016   | ↓**    | 2.5572 | 0.0197   | ↑*           |        |          |        | 2.3627 | 0.0075   | ↑**    |
|                               | Lysine (U)        | 0.7793           | < 0.001  | ↓**    | 0.7688 | < 0.001  | ↓**    | 0.7623 | 0.0010   | ↓**    |        |          |              |        |          |        | 3.9820 | < 0.001  | ↑**    |
|                               | Cysteine (U)      |                  |          |        | 0.7922 | < 0.001  | ↓**    | 0.7663 | 0.0009   | ↓**    |        |          |              | 4.3197 | < 0.001  | ↑**    | 4.3197 | < 0.001  | ↑**    |
|                               | Methionine (U)    | 0.8076           | 0.0033   | ↓**    | 0.6746 | 0.0034   | ↓**    | 0.5238 | 0.0260   | ↓*     | 0.5670 | 0.0162   | ↓*           |        |          |        | 2.2899 | 0.0074   | ↑**    |
|                               | Leucine (U)       |                  |          |        |        |          |        |        |          |        |        |          |              |        |          |        | 2.2732 | 0.0030   | ↑**    |
|                               | Leucine (F)       |                  |          |        |        |          |        |        |          |        | 0.752  | < 0.001  | ↓**          |        |          |        | 1.4215 | 0.0019   | ↑**    |
|                               | Valine (F)        | 0.8001           | 0.0033   | ↓**    | 0.7998 | 0.0033   | ↓**    | 0.8166 | 0.0001   | ↓**    | 0.8313 | 0.0001   | ↓**          |        |          |        | 3.2501 | < 0.001  | ↑**    |
|                               | Ornithine (U)     |                  |          |        | 0.7940 | < 0.001  | ↓**    | 0.7986 | 0.0006   | ↓**    | 0.7994 | 0.0006   | ↓**          |        |          |        | 4.0211 | < 0.001  | ↑**    |
|                               | Arginine (U)      |                  |          |        | 0.8176 | < 0.001  | ↓**    | 0.8034 | 0.0002   | ↓**    | 0.7416 | 0.0166   | ↓*           |        |          |        | 3.6507 | < 0.001  | ↑**    |
|                               | Glutamine (U)     |                  |          |        | 0.7736 | < 0.001  | ↓**    | 0.7789 | 0.0008   | ↓**    | 0.5242 | 0.0273   | ↓*           |        |          |        | 1.8842 | 0.0030   | ↑**    |
| <b>Nucleotides</b>            | Uracil (F)        | 0.4415           | 0.0094   | ↓**    | 0.6760 | 0.0078   | ↓**    | 0.4724 | 0.0448   | ↓*     | 0.7789 | 0.0008   | ↓**          | 3.0477 | < 0.001  | ↑**    |        |          |        |

|                     |                 |        |         |     |        |         |        |        |        |     |        |        |        |        |         |        |         |         |     |
|---------------------|-----------------|--------|---------|-----|--------|---------|--------|--------|--------|-----|--------|--------|--------|--------|---------|--------|---------|---------|-----|
| <b>metabolism</b>   | Uracil (U)      |        |         |     |        |         |        |        |        |     |        |        | 2.0252 | 0.0003 | ↑**     | 3.0477 | < 0.001 | ↑**     |     |
|                     | Adenine (F)     | 0.4738 | 0.0029  | ↓** | 0.5138 | 0.0001  | ↓**    | 0.5377 | 0.0261 | ↓*  | 0.5670 | 0.0162 | ↓*     |        |         |        | 1.7600  | 0.0040  | ↑** |
|                     | Adenine (U)     |        |         |     | 0.7541 | 0.0029  | ↓**    | 0.5708 | 0.0087 | ↓** | 0.6168 | 0.0051 | ↓**    |        |         |        | 3.0295  | 0.0005  | ↑** |
|                     | Hypoxanthine    |        |         |     | 0.6739 | < 0.001 | ↓**    | 0.6690 | 0.0016 | ↓** | 0.6895 | 0.0014 | ↓**    |        |         |        | 3.0578  | 0.0005  | ↑** |
|                     | Xanthine (F)    | 0.6644 | 0.0004  | ↓** | 0.6244 | 0.0042  | ↓**    |        |        |     |        |        |        |        |         |        |         |         |     |
|                     | Xanthine (U)    |        |         |     | 2.3340 | 0.0009  | ↑**    | 2.5373 | 0.0001 | ↑** |        |        |        | 0.5655 | 0.0461  | ↓*     |         |         |     |
|                     | Allantoate (U)  | 1.2659 | 0.0116  | ↑*  | 1.4336 | 0.0004  | ↑**    | 3.4798 | 0.0079 | ↑** |        |        |        |        |         |        |         |         |     |
|                     | Choline (U)     |        |         |     |        |         | 1.3118 | 0.7623 | 0.0010 | ↑** | 1.4053 | 0.0014 | ↑**    | 0.7473 | 0.0014  | ↓**    | 0.6785  | 0.0076  | ↓** |
|                     | TMA (U)         | 1.4914 | 0.0463  | ↑*  | 1.4441 | < 0.001 | ↑**    | 1.2295 | 0.0001 | ↑** | 2.2788 | 0.0300 | ↑*     | 0.6186 | 0.0143  | ↓*     | 0.3957  | 0.0003  | ↓** |
|                     | Betaine (U)     | 0.6114 | < 0.001 | ↓** | 0.6810 | 0.0009  | ↓**    | 0.6361 | 0.0081 | ↓** | 0.6538 | 0.0260 | ↓*     |        |         |        | 2.7146  | 0.0002  | ↑** |
|                     | Creatine (U)    |        |         |     | 0.4180 | < 0.001 | ↓**    | 0.4592 | 0.0313 | ↓*  | 0.4865 | 0.0271 | ↓*     | 2.2733 | 0.0023  | ↑**    | 3.6723  | < 0.001 | ↑** |
|                     | Creatinine (U)  |        |         |     | 0.3118 | < 0.001 | ↓**    | 0.7416 | 0.0166 | ↓*  | 0.7663 | 0.0009 | ↓**    | 2.8366 | 0.0001  | ↑**    | 3.3632  | 0.0001  | ↑** |
|                     | Sarcosine (U)   |        |         |     | 1.2022 | 0.0218  | ↑*     |        |        |     |        |        |        |        |         |        | 3.5613  | < 0.001 | ↑** |
| <b>Gut</b>          | Hippurate (U)   | 1.2323 | 0.0102  | ↑*  | 1.8611 | < 0.001 | ↑**    |        |        |     | 2.2660 | 0.0308 | ↑*     | 2.2826 | < 0.001 | ↑**    | 3.4987  | < 0.001 | ↑** |
| <b>Microbiota</b>   | Acetone (U)     | 0.5777 | < 0.001 | ↓** | 0.5088 | < 0.001 | ↓**    |        |        |     |        |        |        | 1.8569 | 0.0021  | ↑**    | 2.1440  | 0.0298  | ↑*  |
| <b>and Host Co-</b> | Hypotaurine (U) | 0.5582 | < 0.001 | ↓** | 0.5225 | < 0.001 | ↓**    |        |        |     |        |        |        |        |         |        | 2.6967  | 0.0001  | ↑** |
| <b>metabolism</b>   | Taurine (U)     | 1.7218 | < 0.001 | ↑** | 1.7141 | 0.0014  | ↑**    | 1.8011 | 0.0055 | ↑** | 1.7257 | 0.0106 | ↑*     |        |         |        | 0.6927  | < 0.001 | ↓** |
|                     | Taurine (F)     |        |         |     |        |         |        |        |        |     |        |        |        | 0.7281 | 0.0039  | ↓**    |         |         |     |
|                     | Formate (U)     |        |         |     | 0.3835 | 0.0001  | ↓**    | 0.6842 | 0.0277 | ↓*  | 0.7937 | 0.0056 | ↓**    | 2.6147 | 0.0015  | ↑**    | 2.6147  | 0.0015  | ↑** |
|                     | Butyrate (F)    |        |         |     | 0.6794 | 0.0297  | ↓*     | 0.6847 | 0.0189 | ↓*  |        |        |        | 1.7767 | 0.0014  | ↑**    |         |         |     |
|                     | Butyrate (U)    | 0.7575 | < 0.001 | ↓** | 0.7729 | < 0.001 | ↓**    | 0.6440 | 0.0371 | ↓*  |        |        |        | 2.0858 | 0.0008  | ↑**    | 2.2291  | 0.0041  | ↑** |
|                     | Propionate (F)  |        |         |     | 1.4311 | 0.0010  | ↑**    |        |        |     | 1.2696 | 0.0001 | ↑**    | 1.3151 | 0.0110  | ↑*     |         |         |     |
|                     | Propionate (U)  | 0.7983 | 0.0015  | ↓** |        |         |        |        |        |     | 1.2859 | 0.0435 | ↑*     |        |         |        |         |         |     |

Table S4 The metabolic pathway analysis results based on the altered metabolites from the model group compared with the control group on day 42.

|                                             | Total | Hits | Raw <i>P</i> | Holm adjust | FDR      | Impact  |
|---------------------------------------------|-------|------|--------------|-------------|----------|---------|
| <b>Feces</b>                                |       |      |              |             |          |         |
| Propanoate metabolism                       | 23    | 2    | 0.002288     | 0.089228    | 0.054132 | 0       |
| Pantothenate and CoA biosynthesis           | 19    | 4    | 0.002776     | 0.10549     | 0.054132 | 0       |
| beta-Alanine metabolism                     | 21    | 2    | 0.014567     | 0.53897     | 0.11647  | 0       |
| Valine, leucine and isoleucine biosynthesis | 8     | 6    | 0.019856     | 0.71481     | 0.11647  | 0       |
| Purine metabolism                           | 65    | 4    | 0.020742     | 0.72598     | 0.11647  | 0.03396 |
| Pyruvate metabolism                         | 22    | 4    | 0.027458     | 0.93357     | 0.11647  | 0.35147 |
| Glycerolipid metabolism                     | 16    | 1    | 0.02854      | 0.94182     | 0.11647  | 0       |
| Glycolysis / Gluconeogenesis                | 26    | 4    | 0.029273     | 0.94182     | 0.11647  | 0.13055 |
| Glyoxylate and dicarboxylate metabolism     | 32    | 6    | 0.02937      | 0.94182     | 0.11647  | 0.14815 |
| Valine, leucine and isoleucine degradation  | 40    | 5    | 0.03648      | 1           | 0.12934  | 0.02168 |
| Glycine, serine and threonine metabolism    | 33    | 9    | 0.045063     | 1           | 0.14645  | 0.67871 |
| Nitrogen metabolism                         | 39    | 2    | 0.076051     | 1           | 0.22815  | 0.0743  |
| Butanoate metabolism                        | 15    | 3    | 0.087249     | 1           | 0.24305  | 0       |
| Nicotinate and nicotinamide metabolism      | 15    | 2    | 0.11583      | 1           | 0.30116  | 0       |
| Proline metabolism                          | 38    | 4    | 0.13625      | 1           | 0.33212  | 0.14778 |
| Histidine metabolism                        | 16    | 2    | 0.22634      | 1           | 0.51924  | 0.12295 |
| Arginine metabolism                         | 14    | 6    | 0.27031      | 1           | 0.54142  | 0.30457 |
| Pyrimidine metabolism                       | 6     | 1    | 0.27936      | 1           | 0.54142  | 0       |
| Primary bile acid biosynthesis              | 46    | 3    | 0.30457      | 1           | 0.54142  | 0.02493 |
| Taurine and hypotaurine metabolism          | 8     | 1    | 0.31159      | 1           | 0.54142  | 0.42857 |
| Sphingolipid metabolism                     | 21    | 1    | 0.31916      | 1           | 0.54142  | 0       |
| Cysteine and methionine                     | 33    | 3    | 0.3193       | 1           | 0.54142  | 0.1263  |

|                                                     |    |   |          |          |          |         |
|-----------------------------------------------------|----|---|----------|----------|----------|---------|
| metabolism                                          |    |   |          |          |          |         |
| Tryptophan metabolism                               | 41 | 1 | 0.35437  | 1        | 0.57586  | 0.14305 |
| Galactose metabolism                                | 27 | 1 | 0.38811  | 1        | 0.58217  | 0.02924 |
| Fructose and mannose metabolism                     | 20 | 1 | 0.38811  | 1        | 0.58217  | 0       |
| Porphyrin and chlorophyll metabolism                | 30 | 1 | 0.48464  | 1        | 0.68264  | 0       |
| Tyrosine metabolism                                 | 42 | 4 | 0.50396  | 1        | 0.68264  | 0.16435 |
| Citrate cycle (TCA cycle)                           | 20 | 4 | 0.52224  | 1        | 0.68264  | 0.16744 |
| Amino sugar and nucleotide sugar metabolism         | 37 | 2 | 0.52511  | 1        | 0.68264  | 0.05035 |
| Alanine, aspartate and glutamate metabolism         | 28 | 7 | 0.57344  | 1        | 0.72143  | 0.38782 |
| Pentose and glucuronate interconversions            | 18 | 1 | 0.61333  | 1        | 0.74177  | 0       |
| D-Glutamine and D-glutamate metabolism              | 6  | 2 | 0.64592  | 1        | 0.74177  | 0       |
| Glutathione metabolism                              | 28 | 2 | 0.64667  | 1        | 0.74177  | 0.08873 |
| Ubiquinone and other terpenoid-quinone biosynthesis | 9  | 1 | 0.75746  | 1        | 0.84403  | 0       |
| Selenocompound metabolism                           | 20 | 1 | 0.83991  | 1        | 0.89956  | 0       |
| Glycerophospholipid metabolism                      | 36 | 2 | 0.8726   | 1        | 0.89956  | 0.03906 |
| Phenylalanine, tyrosine and tryptophan biosynthesis | 4  | 2 | 0.89226  | 1        | 0.89956  | 1       |
| Phenylalanine metabolism                            | 10 | 3 | 0.89956  | 1        | 0.89956  | 0.35714 |
| <b>Urine</b>                                        |    |   |          |          |          |         |
| Purine metabolism                                   | 66 | 6 | 0.000929 | 0.044598 | 0.044598 | 0.07017 |
| Propanoate metabolism                               | 23 | 3 | 0.002066 | 0.097112 | 0.049589 | 0       |
| Starch and sucrose metabolism                       | 18 | 1 | 0.01255  | 0.57728  | 0.13303  | 0.05023 |

|                                             |    |    |          |         |         |         |
|---------------------------------------------|----|----|----------|---------|---------|---------|
| Ascorbate and aldarate metabolism           | 10 | 1  | 0.016628 | 0.74828 | 0.13303 | 0.25    |
| Pentose and glucuronate interconversions    | 18 | 1  | 0.016628 | 0.74828 | 0.13303 | 0.125   |
| Inositol phosphate metabolism               | 30 | 1  | 0.016628 | 0.74828 | 0.13303 | 0       |
| Pyrimidine metabolism                       | 39 | 4  | 0.020855 | 0.87592 | 0.14301 | 0.08374 |
| Sphingolipid metabolism                     | 21 | 1  | 0.043169 | 1       | 0.25901 | 0       |
| Porphyrin and chlorophyll metabolism        | 30 | 2  | 0.06506  | 1       | 0.34699 | 0       |
| Galactose metabolism                        | 27 | 4  | 0.086591 | 1       | 0.41564 | 0.17844 |
| Glycine, serine and threonine metabolism    | 34 | 11 | 0.10551  | 1       | 0.46041 | 0.72659 |
| Fructose and mannose metabolism             | 18 | 1  | 0.17104  | 1       | 0.57156 | 0       |
| Amino sugar and nucleotide sugar metabolism | 37 | 1  | 0.17104  | 1       | 0.57156 | 0       |
| Histidine metabolism                        | 16 | 3  | 0.17938  | 1       | 0.57156 | 0.12295 |
| Cysteine and methionine metabolism          | 33 | 4  | 0.18768  | 1       | 0.57156 | 0.22222 |
| Thiamine metabolism                         | 7  | 1  | 0.19052  | 1       | 0.57156 | 0       |
| Glycerolipid metabolism                     | 16 | 1  | 0.21183  | 1       | 0.59716 | 0.23676 |
| beta-Alanine metabolism                     | 21 | 2  | 0.22938  | 1       | 0.59716 | 0       |
| Arginine and proline metabolism             | 38 | 8  | 0.2397   | 1       | 0.59716 | 0.36787 |
| Pantothenate and CoA biosynthesis           | 19 | 6  | 0.24882  | 1       | 0.59716 | 0.00714 |
| Glyoxylate and dicarboxylate metabolism     | 32 | 9  | 0.27593  | 1       | 0.62064 | 0.1799  |
| Glutathione metabolism                      | 28 | 6  | 0.31221  | 1       | 0.62064 | 0.1388  |
| Tryptophan metabolism                       | 41 | 2  | 0.32129  | 1       | 0.62064 | 0.14305 |
| Taurine and hypotaurine metabolism          | 8  | 3  | 0.32775  | 1       | 0.62064 | 0.71428 |
| Synthesis and degradation                   | 5  | 1  | 0.35835  | 1       | 0.62064 | 0.6     |

|                                                           |    |    |         |   |         |         |
|-----------------------------------------------------------|----|----|---------|---|---------|---------|
| of ketone bodies                                          |    |    |         |   |         |         |
| Nicotinate and<br>nicotinamide metabolism                 | 15 | 2  | 0.37637 | 1 | 0.62064 | 0.1943  |
| Aminoacyl-tRNA<br>biosynthesis                            | 48 | 18 | 0.37649 | 1 | 0.62064 | 0.16667 |
| Nitrogen metabolism                                       | 6  | 2  | 0.38106 | 1 | 0.62064 | 0       |
| Phenylalanine metabolism                                  | 12 | 5  | 0.39971 | 1 | 0.62064 | 0.35714 |
| Alanine, aspartate and<br>glutamate metabolism            | 28 | 9  | 0.42043 | 1 | 0.62064 | 0.58494 |
| Citrate cycle (TCA cycle)                                 | 20 | 6  | 0.4298  | 1 | 0.62064 | 0.30194 |
| Arginine biosynthesis                                     | 14 | 7  | 0.4631  | 1 | 0.62064 | 0.2538  |
| Pyruvate metabolism                                       | 22 | 5  | 0.46458 | 1 | 0.62064 | 0.38257 |
| Butanoate metabolism                                      | 15 | 5  | 0.47244 | 1 | 0.62064 | 0.11111 |
| Primary bile acid<br>biosynthesis                         | 46 | 2  | 0.47498 | 1 | 0.62064 | 0.04478 |
| Lysine degradation                                        | 25 | 1  | 0.47841 | 1 | 0.62064 | 0       |
| Biotin metabolism                                         | 10 | 1  | 0.47841 | 1 | 0.62064 | 0       |
| Valine, leucine and<br>isoleucine degradation             | 40 | 8  | 0.50265 | 1 | 0.62598 | 0.07143 |
| Tyrosine metabolism                                       | 42 | 5  | 0.51162 | 1 | 0.62598 | 0.16435 |
| Phenylalanine, tyrosine<br>and tryptophan<br>biosynthesis | 4  | 2  | 0.52165 | 1 | 0.62598 | 1       |
| D-Glutamine and D-<br>glutamate metabolism                | 6  | 3  | 0.55993 | 1 | 0.65553 | 0.5     |
| Glycolysis /<br>Gluconeogenesis                           | 26 | 5  | 0.58601 | 1 | 0.66972 | 0.13055 |
| Ether lipid metabolism                                    | 20 | 1  | 0.6383  | 1 | 0.70815 | 0       |
| Fatty acid degradation                                    | 39 | 1  | 0.6533  | 1 | 0.70815 | 0       |
| Glycerophospholipid<br>metabolism                         | 36 | 4  | 0.66389 | 1 | 0.70815 | 0.0872  |
| Valine, leucine and<br>isoleucine biosynthesis            | 8  | 6  | 0.70017 | 1 | 0.73061 | 0       |
| Selenocompound<br>metabolism                              | 20 | 1  | 0.77348 | 1 | 0.78993 | 0       |

|                      |   |   |         |   |         |   |
|----------------------|---|---|---------|---|---------|---|
| Ubiquinone and other |   |   |         |   |         |   |
| terpenoid-quinone    | 9 | 1 | 0.83967 | 1 | 0.83967 | 0 |
| biosynthesis         |   |   |         |   |         |   |

---

Table S5. The metabolic pathway analysis results based on the altered metabolites from the SBS group compared with the model group on day 42.

|                                                     | Total | Hits | Raw <i>P</i> | Holm adjust | FDR      | Impact  |
|-----------------------------------------------------|-------|------|--------------|-------------|----------|---------|
| <b>Feces</b>                                        |       |      |              |             |          |         |
| Primary bile acid biosynthesis                      | 146   | 3    | 0.000726     | 0.028333    | 0.014386 | 0.06763 |
| Aminoacyl-tRNA biosynthesis                         | 48    | 14   | 0.001621     | 0.061613    | 0.014386 | 0.16667 |
| Purine metabolism                                   | 66    | 4    | 0.001653     | 0.061613    | 0.014386 | 0.05592 |
| Valine, leucine and isoleucine biosynthesis         | 40    | 5    | 0.002347     | 0.084507    | 0.014386 | 0.02168 |
| Valine, leucine and isoleucine degradation          | 8     | 4    | 0.002651     | 0.092778    | 0.014386 | 0       |
| Glycolysis / Gluconeogenesis                        | 32    | 6    | 0.002768     | 0.094119    | 0.014386 | 0.14815 |
| Pyruvate metabolism                                 | 22    | 4    | 0.002889     | 0.095332    | 0.014386 | 0.35147 |
| Phenylalanine, tyrosine and tryptophan biosynthesis | 26    | 4    | 0.002951     | 0.095332    | 0.014386 | 0.13055 |
| Pentose and glucuronate interconversions            | 18    | 2    | 0.006914     | 0.21433     | 0.02996  | 0.07812 |
| Taurine and hypotaurine metabolism                  | 8     | 1    | 0.01098      | 0.32941     | 0.041915 | 0.42857 |
| Amino sugar and nucleotide sugar metabolism         | 37    | 3    | 0.011822     | 0.34284     | 0.041915 | 0.06569 |
| Citrate cycle (TCA cycle)                           | 21    | 1    | 0.02533      | 0.70925     | 0.082323 | 0       |
| Cysteine and methionine metabolism                  | 33    | 3    | 0.034387     | 0.92844     | 0.10316  | 0.1263  |
| Ubiquinone and other terpenoid-quinone biosynthesis | 9     | 1    | 0.062677     | 1           | 0.16659  | 0       |
| Tyrosine metabolism                                 | 42    | 4    | 0.064071     | 1           | 0.16659  | 0.16435 |
| Glycerolipid metabolism                             | 16    | 1    | 0.089859     | 1           | 0.20551  | 0       |

|                                             |    |   |          |   |         |         |
|---------------------------------------------|----|---|----------|---|---------|---------|
| Phenylalanine metabolism                    | 12 | 3 | 0.094106 | 1 | 0.20551 | 0.35714 |
| Glyoxylate and dicarboxylate metabolism     | 4  | 2 | 0.094852 | 1 | 0.20551 | 1       |
| Glycine, serine and threonine metabolism    | 34 | 9 | 0.10903  | 1 | 0.2238  | 0.70251 |
| Glycerophospholipid metabolism              | 36 | 2 | 0.11662  | 1 | 0.22741 | 0.03906 |
| Arginine biosynthesis                       | 14 | 6 | 0.12321  | 1 | 0.22881 | 0.30457 |
| Sphingolipid metabolism                     | 20 | 4 | 0.1595   | 1 | 0.28075 | 0.16744 |
| D-Glutamine and D-glutamate metabolism      | 6  | 2 | 0.17052  | 1 | 0.28075 | 0       |
| Alanine, aspartate and glutamate metabolism | 28 | 7 | 0.17672  | 1 | 0.28075 | 0.38782 |
| Arginine and proline metabolism             | 38 | 4 | 0.18502  | 1 | 0.28075 | 0.14778 |
| Histidine metabolism                        | 16 | 2 | 0.18717  | 1 | 0.28075 | 0.12295 |
| Nitrogen metabolism                         | 6  | 1 | 0.20088  | 1 | 0.29016 | 0       |
| Pyrimidine metabolism                       | 39 | 2 | 0.2109   | 1 | 0.29376 | 0.0743  |
| Nicotinate and nicotinamide metabolism      | 15 | 2 | 0.24706  | 1 | 0.33225 | 0       |
| Galactose metabolism                        | 27 | 1 | 0.27616  | 1 | 0.34742 | 0.02924 |
| Fructose and mannose metabolism             | 18 | 1 | 0.27616  | 1 | 0.34742 | 0       |
| beta-Alanine metabolism                     | 21 | 2 | 0.33517  | 1 | 0.40849 | 0       |
| Pantothenate and CoA biosynthesis           | 19 | 3 | 0.35809  | 1 | 0.4232  | 0       |
| Selenocompound metabolism                   | 20 | 1 | 0.47018  | 1 | 0.53932 | 0       |
| Porphyrin and chlorophyll metabolism        | 30 | 1 | 0.4942   | 1 | 0.55068 | 0       |

|                                                     |    |    |          |          |          |         |
|-----------------------------------------------------|----|----|----------|----------|----------|---------|
| Propoate metabolism                                 | 23 | 2  | 0.67914  | 1        | 0.73574  | 0       |
| Tryptophan metabolism                               | 41 | 1  | 0.74074  | 1        | 0.75638  | 0.14305 |
| Glutathione metabolism                              | 28 | 2  | 0.75379  | 1        | 0.75638  | 0.08873 |
| Butanoate metabolism                                | 15 | 3  | 0.75638  | 1        | 0.75638  | 0       |
| <b>Urine</b>                                        |    |    |          |          |          |         |
| Arginine and proline metabolism                     | 38 | 8  | 7.21E-05 | 0.00346  | 0.002007 | 0.36787 |
| Glutathione metabolism                              | 28 | 6  | 8.36E-05 | 0.00393  | 0.002007 | 0.1388  |
| Butanoate metabolism                                | 15 | 5  | 0.000153 | 0.007026 | 0.002444 | 0.11111 |
| Aminoacyl-tRNA biosynthesis                         | 48 | 18 | 0.000316 | 0.014205 | 0.00354  | 0.16667 |
| Phenylalanine, tyrosine and tryptophan biosynthesis | 4  | 2  | 0.000377 | 0.01657  | 0.00354  | 1       |
| Ubiquinone and other terpenoid-quinone biosynthesis | 9  | 1  | 0.000443 | 0.019027 | 0.00354  | 0       |
| Pantothenate and CoA biosynthesis                   | 19 | 7  | 0.000547 | 0.022987 | 0.003753 | 0.02857 |
| Arginine biosynthesis                               | 14 | 7  | 0.000663 | 0.027187 | 0.003979 | 0.2538  |
| D-Glutamine and D-glutamate metabolism              | 6  | 3  | 0.0008   | 0.032009 | 0.004115 | 0.5     |
| Taurine and hypotaurine metabolism                  | 8  | 3  | 0.000857 | 0.033432 | 0.004115 | 0.71428 |
| Cysteine and methionine metabolism                  | 33 | 4  | 0.001124 | 0.042691 | 0.004902 | 0.22222 |
| Tyrosine metabolism                                 | 42 | 5  | 0.001657 | 0.061322 | 0.006396 | 0.16435 |
| Thiamine metabolism                                 | 7  | 1  | 0.00195  | 0.070211 | 0.006396 | 0       |
| Phenylalanine metabolism                            | 12 | 5  | 0.001988 | 0.070211 | 0.006396 | 0.35714 |
| Glycine, serine and threonine metabolism            | 34 | 12 | 0.002025 | 0.070211 | 0.006396 | 0.72659 |
| Glycolysis / Gluconeogenesis                        | 26 | 5  | 0.002162 | 0.071331 | 0.006396 | 0.13055 |
| Primary bile acid                                   | 46 | 2  | 0.002283 | 0.073044 | 0.006396 | 0.04478 |

|                                             |    |   |          |          |          |         |
|---------------------------------------------|----|---|----------|----------|----------|---------|
| biosynthesis                                |    |   |          |          |          |         |
| Lysine degradation                          | 25 | 2 | 0.002596 | 0.080465 | 0.006396 | 0       |
| Biotin metabolism                           | 10 | 1 | 0.002603 | 0.080465 | 0.006396 | 0       |
| Alanine, aspartate and glutamate metabolism | 28 | 9 | 0.002665 | 0.080465 | 0.006396 | 0.58494 |
| Citrate cycle (TCA cycle)                   | 20 | 6 | 0.002875 | 0.080502 | 0.006402 | 0.30194 |
| Valine, leucine and isoleucine biosynthesis | 8  | 6 | 0.002934 | 0.080502 | 0.006402 | 0       |
| Pentose and glucuronate interconversions    | 18 | 2 | 0.003241 | 0.08427  | 0.006761 | 0.125   |
| Valine, leucine and isoleucine degradation  | 40 | 7 | 0.00338  | 0.084508 | 0.006761 | 0.04879 |
| Sphingolipid metabolism                     | 21 | 1 | 0.003947 | 0.094733 | 0.007579 | 0       |
| Tryptophan metabolism                       | 41 | 2 | 0.004359 | 0.10026  | 0.008048 | 0.14305 |
| Glycerophospholipid metabolism              | 36 | 4 | 0.004936 | 0.10859  | 0.008775 | 0.0872  |
| Fructose and mannose metabolism             | 18 | 1 | 0.005355 | 0.11245  | 0.008863 | 0       |
| Amino sugar and nucleotide sugar metabolism | 37 | 1 | 0.005355 | 0.11245  | 0.008863 | 0       |
| Fatty acid degradation                      | 39 | 1 | 0.007207 | 0.13692  | 0.01153  | 0       |
| Ether lipid metabolism                      | 20 | 1 | 0.007807 | 0.14052  | 0.011712 | 0       |
| Galactose metabolism                        | 27 | 4 | 0.007871 | 0.14052  | 0.011712 | 0.17844 |
| Glyoxylate and dicarboxylate metabolism     | 32 | 9 | 0.008117 | 0.14052  | 0.011712 | 0.1799  |
| Synthesis and degradation of ketone bodies  | 5  | 1 | 0.008296 | 0.14052  | 0.011712 | 0.6     |
| Pyrimidine metabolism                       | 39 | 5 | 0.010006 | 0.14052  | 0.013723 | 0.08374 |
| Ascorbate and aldarate metabolism           | 10 | 1 | 0.023451 | 0.30487  | 0.030117 | 0.25    |

|                                              |    |   |          |         |          |         |
|----------------------------------------------|----|---|----------|---------|----------|---------|
| Inositol phosphate<br>metabolism             | 30 | 1 | 0.023451 | 0.30487 | 0.030117 | 0       |
| Starch and sucrose<br>metabolism             | 18 | 1 | 0.023842 | 0.30487 | 0.030117 | 0.05023 |
| Histidine metabolism                         | 16 | 3 | 0.053986 | 0.53986 | 0.066445 | 0.12295 |
| Glycerolipid metabolism                      | 16 | 1 | 0.056716 | 0.53986 | 0.068059 | 0.23676 |
| Nicotinate and<br>nicotinamide<br>metabolism | 15 | 1 | 0.059016 | 0.53986 | 0.069091 | 0       |
| beta-Alanine<br>metabolism                   | 21 | 3 | 0.060793 | 0.53986 | 0.069478 | 0.39925 |
| Nitrogen metabolism                          | 6  | 2 | 0.071395 | 0.53986 | 0.079696 | 0       |
| Porphyrin and<br>chlorophyll metabolism      | 30 | 2 | 0.076027 | 0.53986 | 0.081454 | 0       |
| Purine metabolism                            | 66 | 6 | 0.076363 | 0.53986 | 0.081454 | 0.07017 |
| Pyruvate metabolism                          | 22 | 5 | 0.12848  | 0.53986 | 0.13407  | 0.38257 |
| Propanoate metabolism                        | 23 | 4 | 0.14103  | 0.53986 | 0.14404  | 0       |
| Selenocompound<br>metabolism                 | 20 | 1 | 0.18842  | 0.53986 | 0.18842  | 0       |

---
